# Supplementary material
Source: publisher site journal article supplement (https://www.spandidos-publications.com/8211/downloadSupplementary)
Supplement: Supplementary file 1 [file downloadSupplementary]

**Table SI.** Primer sequences used for reverse transcription-quantitative PCR.

| Gene or miR name) | Primer sequence (5'-3')      |
|-------------------|------------------------------|
| Ablim1            | F: CACTTCCACCGACCTGGCAATG    |
|                   | R: GCCTGAGCGTAAGTTGGAGTTAGAG |
| Ddx5              | F: GCCAGTTGCTCTCAGTGGAT      |
|                   | R: AGTTCTCGAGTTGGTGCCAG      |
| Slc7a1-1          | F: TCCACCAGTCTCCTAGGCTC      |
|                   | R: AAGAGGAAGGCCATCACAGC      |
| Acta2             | F: CTATGAGGGCTATGCCTTGCC     |
|                   | R: GCTCAGCAGTAGTAACGAAGGA    |
| Tagln             | F: CAACAAGGGTCCATCCTACGG     |
|                   | R: ATCTGGGCGGCCTACATCA       |
| Cnn1              | F: GGCATGACAGTGTATGGGCTTCC   |
|                   | R: AGTTGTGCGGGTGGTGATTGTG    |
| 18s               | F: CGCCGCTAGAGGTGAAATTC      |
|                   | R: TTGGCAAATGCTTTTCGCTC      |
| MMP2              | F: CAAGGATGGACTCCTGGCACAT    |
|                   | R: TACTCGCCATCAGCGTTCCCAT    |
| U6                | F: CAGCACATATACTAAAATTGGAACG |
|                   | R: ACGAATTTGCGTGTCATCC       |
| miR-378a-5p       | F: CTCCTGACTCCAGGTCCTGTGT    |
| miR-200b-3p       | F: TAATACTGCCTGGTAATGATGA    |
| miR-200c-3p       | F: UAAUACUGCCGGGUAUGAUGGA    |
| miR-342-5p        | F: AGGGGUGCUAUCUGUGAUUGAG    |
| miR-150-3p        | F: CUGGUACAGGCCUGGGGGAUAG    |
| miR-149-5p        | F: UCUGGCUCCGUGUCUUCACUCCC   |
| miR-39-3p         | F: TCACCGGGTGTAATCAGCTTG     |
| Reverse           | AACGCTTACGAATTTGCGT          |

miR, microRNA; ABLIM1, actin-binding LIM protein 1; MMP, matrix metalloproteinase; F, forward; R, reverse.

**Table SII.** Sequences of miRNA mimic, miRNA inhibitor and siRNA.

| <b>Name</b>                      | <b>Sequence (5'-3')</b>               |
|----------------------------------|---------------------------------------|
| <b>miR-378a-5p mimic</b>         | F: CUCCUGACUCCAGGUCCUGUGU             |
|                                  | R: ACAGGACCUGGAGUCAGGAGUU             |
| <b>Mimic-NC</b>                  | F: UUCUCCGAACGUGUCACGUTT              |
|                                  | R: ACGUGACACGUUCGGAGAATT-             |
| <b>miR-378a-5p inhibitor</b>     | F: ACACAGGACCUGGAGUCAGGAG             |
|                                  | R: UUCUCCGAACGUGUCACGUTT-             |
| <b>Inhibitor -NC</b>             | F: CAGUACUUUUGUGUAGUACAA              |
|                                  | R: ACGUGACACGUUCGGAGAATT              |
| <b>Mouse <i>Ablim1</i> siRNA</b> | Sense: AATCGCAAATAACTACGTAATACG       |
|                                  | Antisense: CCGGCACAGUUACA CUCCAACUACG |
| <b>Mouse <i>Mkl1</i> siRNA</b>   | Sense: GCUGGUCAGGAUGCACAUUTT          |
|                                  | Antisense: AAUGUGCAUCCUGACCAGCTT      |
| <b>Mouse NC siRNA</b>            | Sense: UUCUCCGAACGUGUCACGUTT          |
|                                  | Antisense: ACGUGACACGUUCGGAGAATT      |

miR or miRNA, microRNA; siRNA, small interfering RNA; NC, negative control; ABLIM1, actin-binding LIM protein 1; MKL1, megakaryoblastic leukemia1.
